# Supplementary material for: ISG15/USP18/STAT2 is a molecular hub regulating autocrine IFN I-mediated control of Dengue and Zika virus replication
Source: bioRxiv or medRxiv preprint supplement (doi:10.1101/784678), 2023-11-01

**Figure S2-Espada et al.**

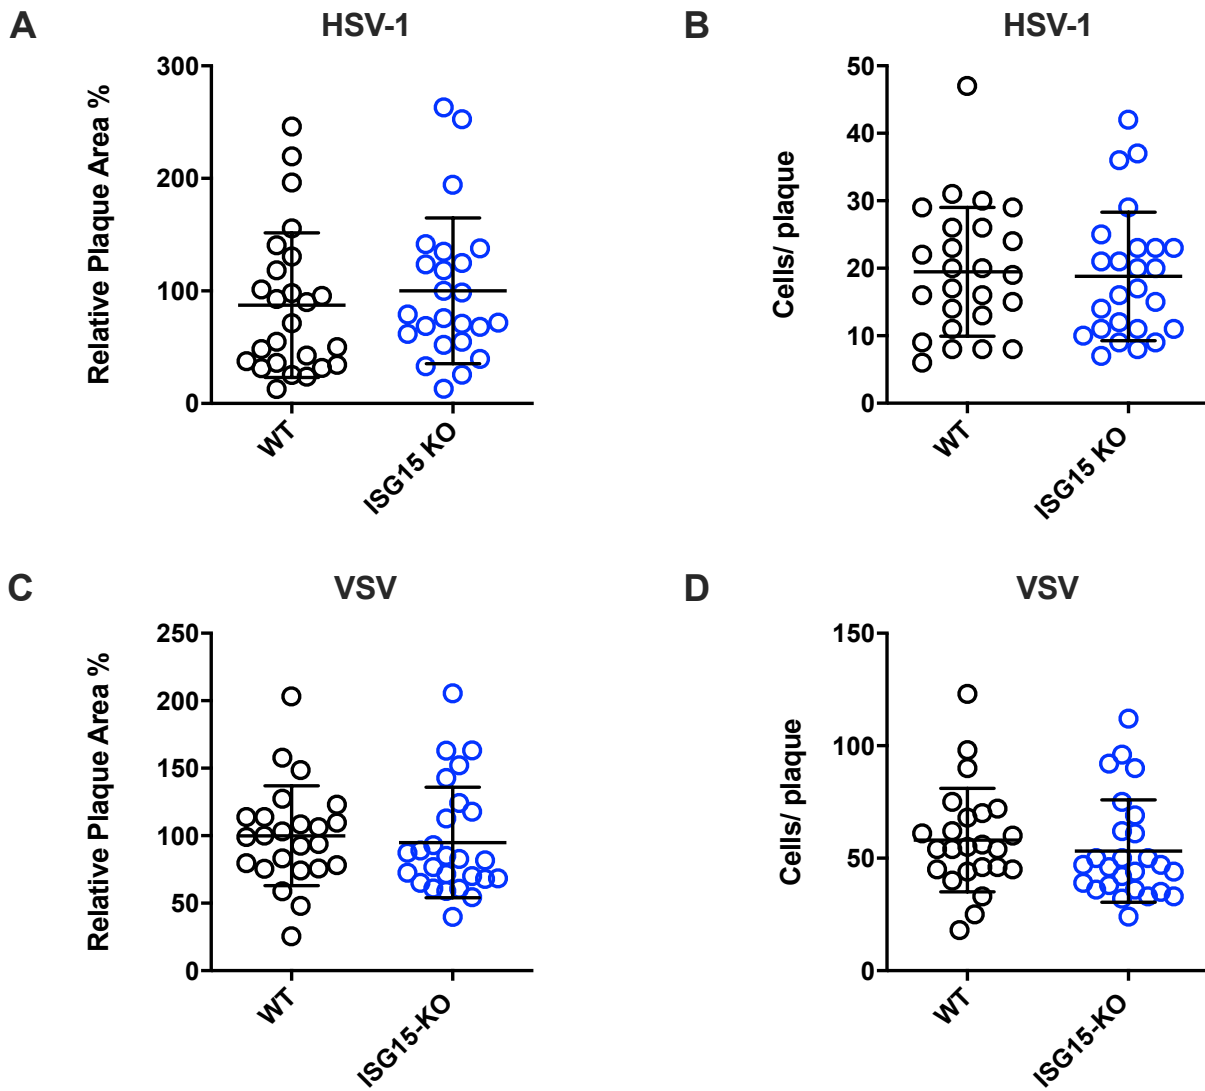

Supplement: Supplementary file [file media-2.pdf]
