# Supplementary material for: ISG15/USP18/STAT2 is a molecular hub regulating autocrine IFN I-mediated control of Dengue and Zika virus replication
Source: bioRxiv or medRxiv preprint supplement (doi:10.1101/784678), 2023-11-01

# Figure S3-Espada *et al.*

**A**

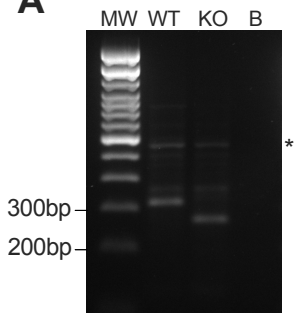

**B**

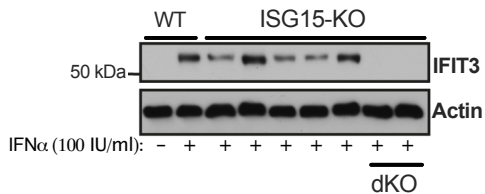

**C**

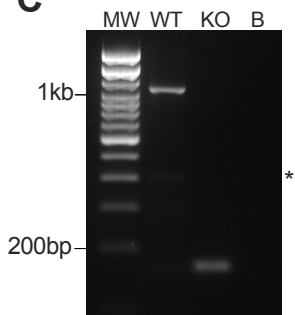

**D**

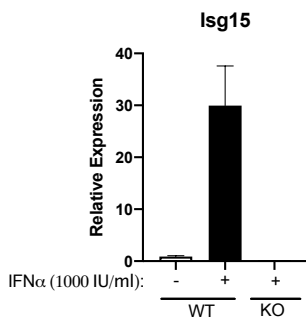

**E**

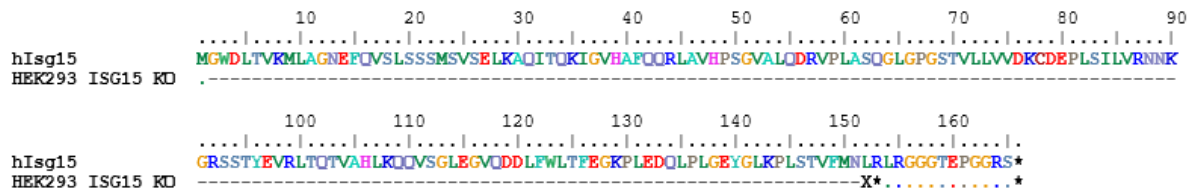

Supplement: Supplementary file [file media-3.pdf]
