# Supplementary material for: ISG15/USP18/STAT2 is a molecular hub regulating autocrine IFN I-mediated control of Dengue and Zika virus replication
Source: bioRxiv or medRxiv preprint supplement (doi:10.1101/784678), 2023-11-01
Supplement: Supplementary file [file media-6.pdf]

**Table S1- Espada et al.**

---

Supplementary Table 1: sgRNA and primers sequences used in this study

---

| Target name               | Sequence (5'-)          |
|---------------------------|-------------------------|
| Herc5-gRNA 1              | CGCTCCATCGCCGCTTTGCG    |
| Herc5-gRNA 2              | GGCGCGTCACCTCCACCCTC    |
| Herc5-PCR genotyping-Fw   | CTCTGGGCCTGGGACCC       |
| Herc5-PCR genotyping-Rv   | CACACACCAGCCCCACTC      |
| lfnar1-gRNA 1             | GCAGCCGCAGGTGAGAGGCG    |
| lfnar1-gRNA 2             | CTGCGGCGGCTCCCAGATGA    |
| lfnar1-PCR genotyping-Fw  | CGAACATGTAAGTGGTGGGA    |
| lfnar1-PCR genotyping-Rv  | CCACTTTCTCCTGGTTGATTTG  |
| lsg15-gRNA1               | GGCTGTGGGCTGTGGGCTGT    |
| lsg15-gRNA 2              | GGTAAGGCAGATGTCACAGG    |
| lsg15-gRNA3               | TGGAGCTGCTCAGGGACACC    |
| lsg15KO-PCR genotyping-Fw | GCTGAGAGGCAGCGAACTCAT   |
| lsg15KO-PCR genotyping-Rv | GCAGGATCAAGGGCCGGA      |
| GFP-Fw                    | ACCAGCAGAACACCCCCATCG   |
| GFP-Rv                    | GCGGTCACGAACTCCAGCAGG   |
| h18S-Fw                   | TAGAGGGACAAGTGGCGTTC    |
| h18S-Rv                   | CGCTGAGCCAGTCAGTGT      |
| DV-PrM-Fw                 | TTGTCCTAATGATGCTGGTCCG  |
| DV-PrM-Rv                 | TCCACCTGAGACTCCTTCCA    |
| hlsg15-Fw                 | TCCTGGTGAGGAATAACAAGGG  |
| hlsg15-Rv                 | GACGACCTGTTCTGGCTGAC    |
| hlf1-Fw                   | ACGGTATGCTTGGAAACGATTG  |
| hlf1-Rv                   | TGGTGAGGGCTTTCTTTTCC    |
| hUsp18-Fw                 | CCTGAGGCAAATCTGTCAGTC   |
| hUsp18-Rv                 | CGAACACCTGAATCAAGGAGTTA |
| hlf1B1-Fw                 | CGAACACCTGAATCAAGGAGTTA |
| hlf1B1-Rv                 | AGGAGATCTTCAGTTTTCGGAGG |

---
